# Supplementary material for: Nanoporous gold film: fabrication and role as a catalytic reactor
Source: Royal Society of Chemistry journal article supplement (doi:10.1039/c5dt01659b), 2015-01-01
Supplement: c5dt01659b1.pdf [file c5dt01659b1.pdf]

## Supporting Information

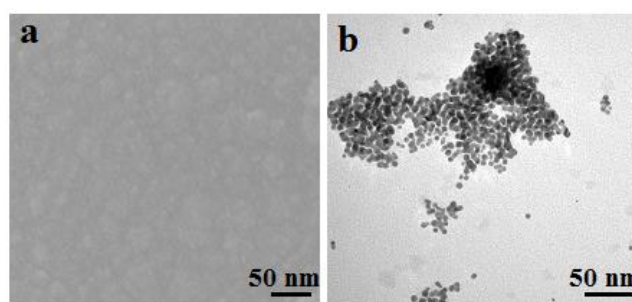

Figure S1. SEM and TEM images of PPY film (a) and Au-HTPC seeds (b)

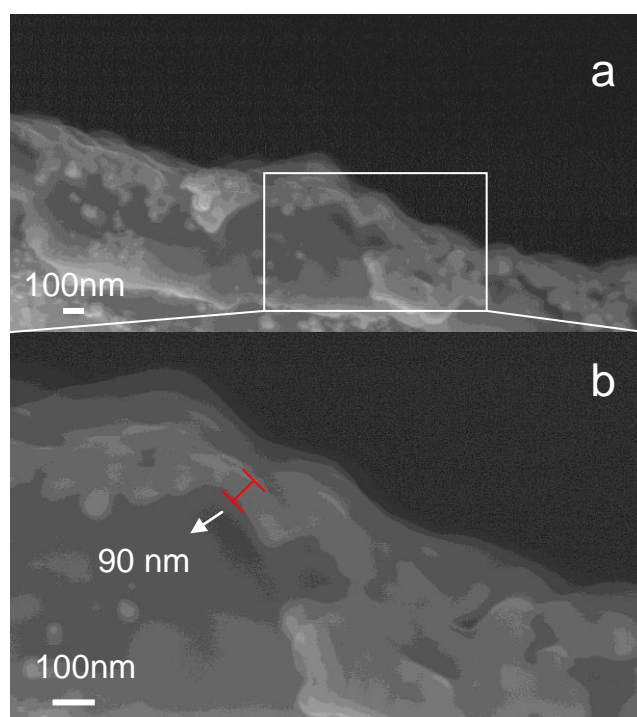

Figure S2. The cross-sectional SEM image of NPG film

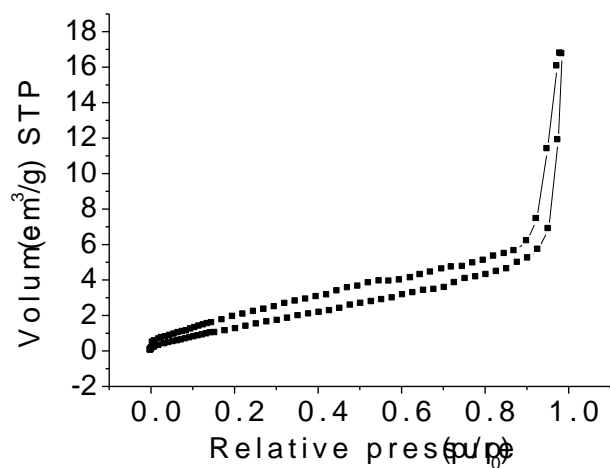

Figure S3 Nitrogen sorption isotherms of thin NPG film

$N_2$  sorption isotherms (Figure S3) of NPG film show pseudo-type-I curve with H1 hysteresis loop at a high relative pressure. The hysteresis loop at a higher  $p/p_0$  (0.92-0.987) may be contributed by the inter-particle texture and nanoporous characterization.

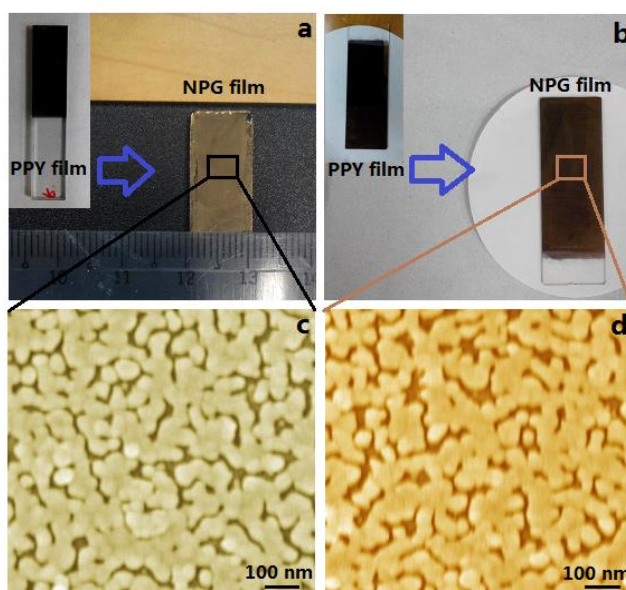

Figure S4. NPG films fabricated on different substrates (a) ITO glass, (b) universal glass

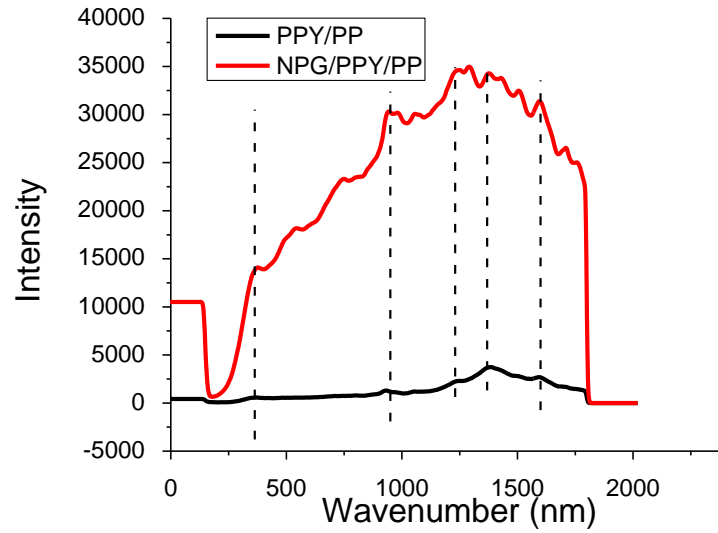

Figure S5. Raman spectra of PPY and NPG/PPY on the inwall of PPCT

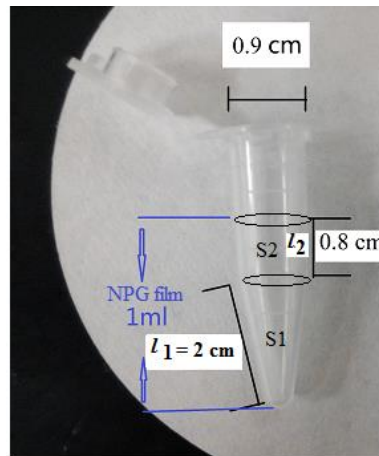

Figure S6 Image of PPCT (1.5 ml)

***The caculation of inwall area of PPCT***

The inwall area of circular cone ( $S_1$ ) of PPCT

$$S_1 = \pi r l_2 = 3.14 \times 0.45 \text{ cm} \times 2 \text{ cm} = 2.82 \text{ cm}^2$$

The inwall area of circular column ( $S_2$ ) of the PPCT

$$S_2 = 2\pi r l_1 = 2 \times 3.14 \times 0.45 \text{ cm} \times 0.8 \text{ cm} = 2.26 \text{ cm}^2$$

$$S_{\text{total}} = S_1 + S_2 = 5.08 \text{ cm}^2$$
